# Supplementary material for: Adsorption energy as a promising single-parameter descriptor for single atom catalysis in the oxygen evolution reaction
Source: Royal Society of Chemistry journal article supplement (doi:10.1039/d0ta12567a), 2021-01-01
Supplement: d0ta12567a1.pdf [file d0ta12567a1.pdf]

## Supporting Information for

### Adsorption energy as a promising single-parameter descriptor for single atom catalysis in oxygen evolution reaction

Hai-Cai Huang,<sup>†</sup> Jun Li,<sup>†</sup> Yang Zhao,<sup>†</sup> Jing Chen,<sup>†,‡</sup> Yu-Xiang Bu,<sup>†,§</sup> and Shi-Bo Cheng<sup>\*,†</sup>

<sup>†</sup>Key Laboratory for Colloid and Interface Chemistry, Ministry of Education, School of Chemistry and Chemical Engineering, Shandong University, Jinan 250100, People's Republic of China

<sup>‡</sup>Suzhou Institute of Shandong University, Suzhou, Jiangsu 215123, People's Republic of China

<sup>§</sup>School of Chemistry and Chemical Engineering, Qufu Normal University, Qufu 273165, People's Republic of China

#### Note 1

In this study, the oxygen evolution reaction (OER) is considered as four elementary steps. The Gibbs free energy ( $\Delta G$ ) for each step was calculated as follows:

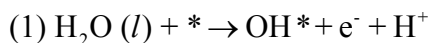

$$\begin{aligned} \Delta G_1 &= \mu_{\text{OH}^*} + \mu_{\text{H}^+} + \mu_{e^-} - \mu_{\text{H}_2\text{O}} - \mu_* \\ &= \Delta E_{\text{OH}} + \Delta E_{\text{ZPE}(\text{OH})} - T\Delta E_{\text{OH}} + G_{\text{solv}(\text{OH}^*)} \\ &= \Delta G_{\text{OH}} \end{aligned}$$

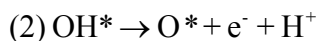

$$\begin{aligned} \Delta G_1 &= \mu_{\text{O}^*} + \mu_{\text{H}^+} + \mu_{e^-} - \mu_{\text{OH}^*} \\ &= (\Delta E_{\text{O}} + \Delta E_{\text{ZPE}(\text{O})} - T\Delta E_{\text{O}} + G_{\text{solv}(\text{O}^*)}) - (\Delta E_{\text{OH}} + \Delta E_{\text{ZPE}(\text{OH})} - T\Delta E_{\text{OH}} + G_{\text{solv}(\text{OH}^*)}) \\ &= \Delta G_{\text{O}} - \Delta G_{\text{OH}} \end{aligned}$$

---

\*Corresponding author: Tel: +86 0531-88363058. E-mail address: shibocheng@sdu.edu.cn. (S.B. Cheng).

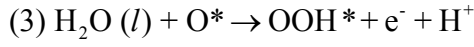

$$\begin{aligned} \Delta G_1 &= \mu_{\text{OOH}^*} + \mu_{\text{H}^+} + \mu_{\text{e}^-} - \mu_{\text{O}^*} - \mu_{\text{H}_2\text{O}} \\ &= (\Delta E_{\text{OOH}} + \Delta E_{\text{ZPE}(\text{OOH})} - T\Delta E_{\text{OOH}} + G_{\text{solv}(\text{OOH}^*)}) - (\Delta E_{\text{O}} + \Delta E_{\text{ZPE}(\text{O})} - T\Delta E_{\text{O}} + G_{\text{solv}(\text{O}^*)}) \\ &= \Delta G_{\text{OOH}} - \Delta G_{\text{O}} \end{aligned}$$

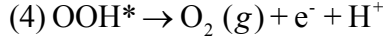

$$\begin{aligned} \Delta G_1 &= \mu_* + \mu_{\text{O}_2^*} + \mu_{\text{H}^+} + \mu_{\text{e}^-} - \mu_{\text{OOH}^*} \\ &= 4.92 - (\Delta E_{\text{OOH}} + \Delta E_{\text{ZPE}(\text{OOH})} - T\Delta E_{\text{OOH}} + G_{\text{solv}(\text{OOH}^*)}) \\ &= 4.92 - \Delta G_{\text{OOH}} \end{aligned}$$

The overpotential for OER is obtained by:

$$\eta_{\text{OER}} = \frac{\max(\Delta G_1, \Delta G_2, \Delta G_3, \Delta G_4)}{e} - 1.23\text{V}$$

Although the zero-point energy and entropy of various OER intermediates for different SACs are different, the difference between them is very small which can be ignored, as shown in Table S3. Therefore, for the convenience of calculation, we adopted the data of previous work<sup>[S1]</sup> about the zero-point energy and entropy of various OER intermediates, as listed in Table S4.

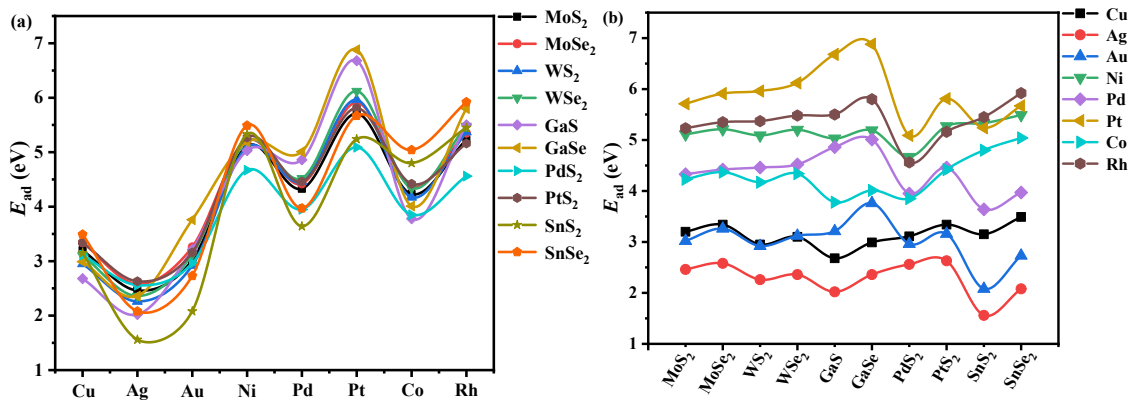

**Fig. S1** Adsorption energies of various SACs. (some data are obtained from our previous work<sup>[S2]</sup>)

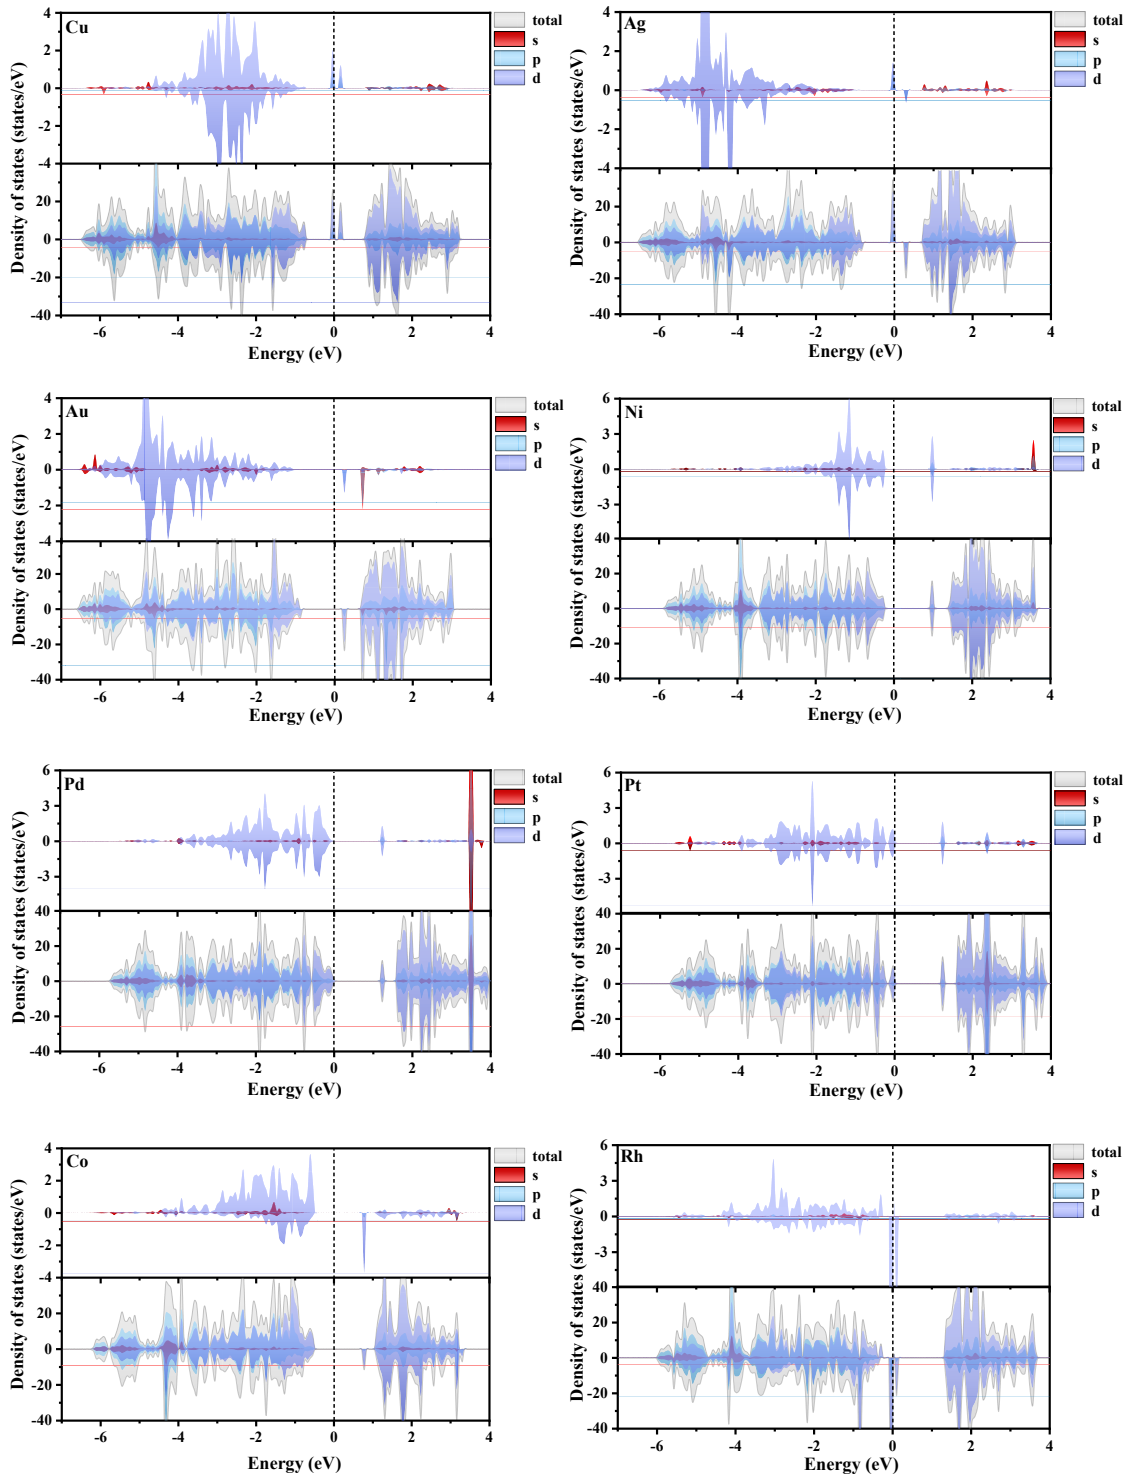

**Fig. S2** Density of states for TM-MoSe<sub>2</sub>.

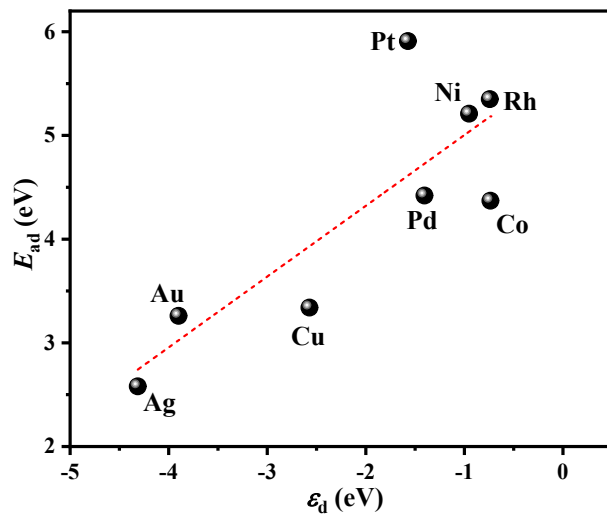

Fig.S3 Scaling relationship between the  $\epsilon_d$  and  $E_{ad}$  of TM-MoS<sub>2</sub>.

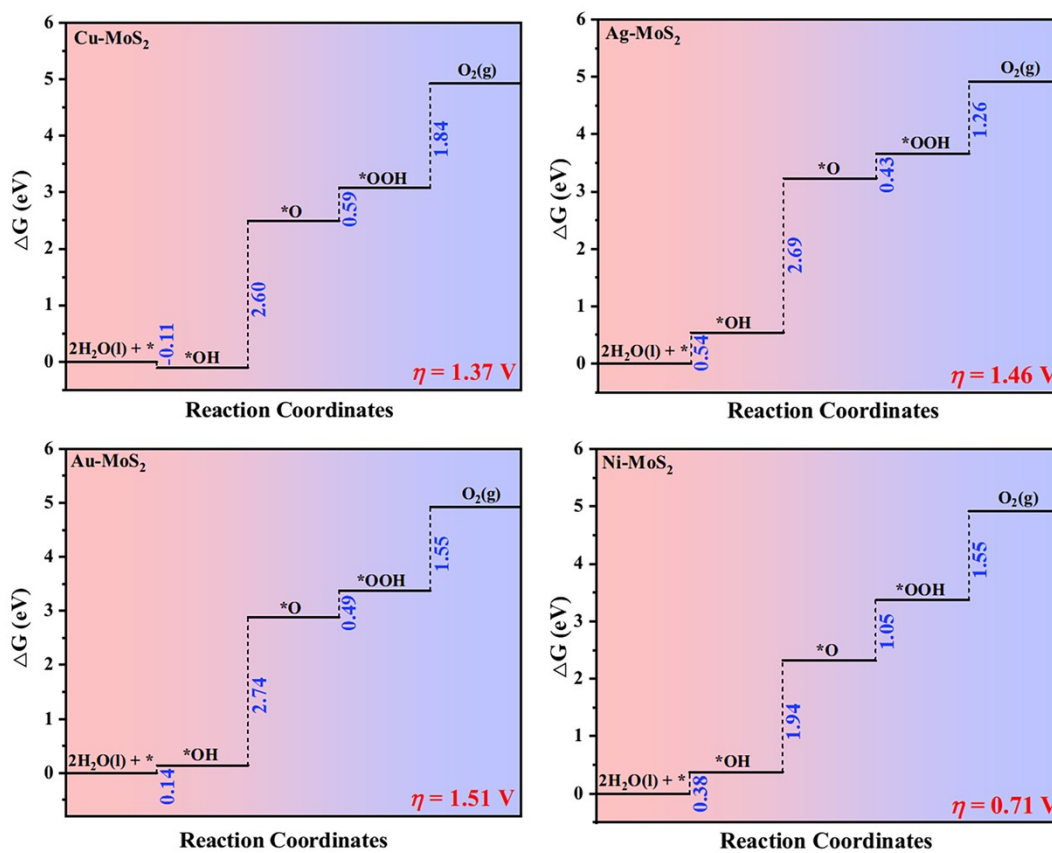

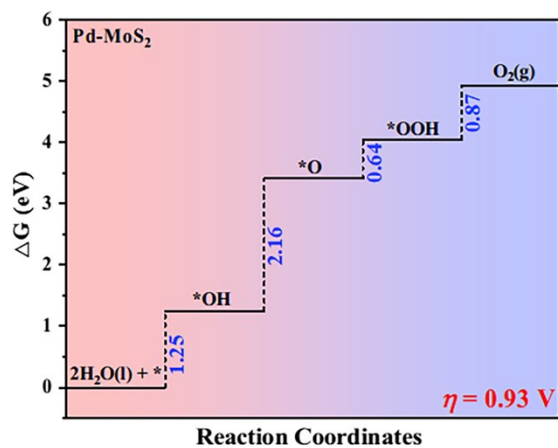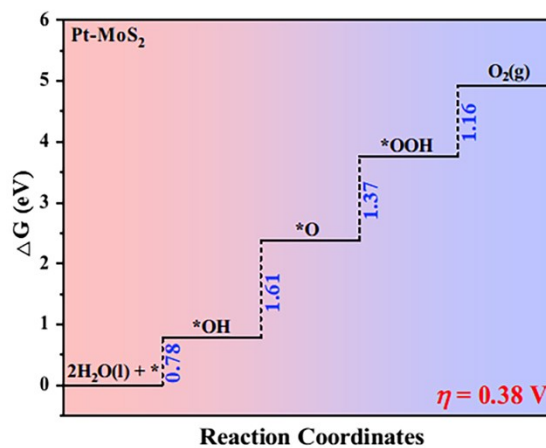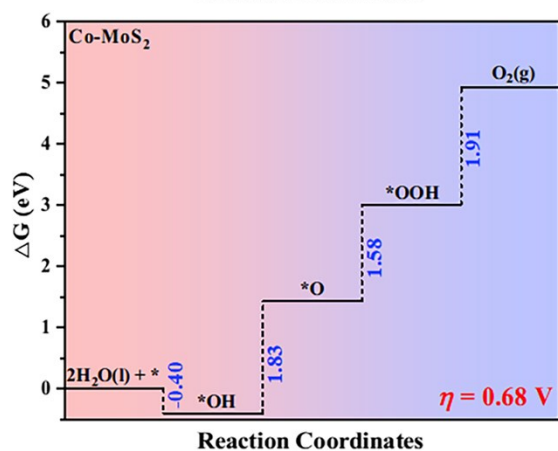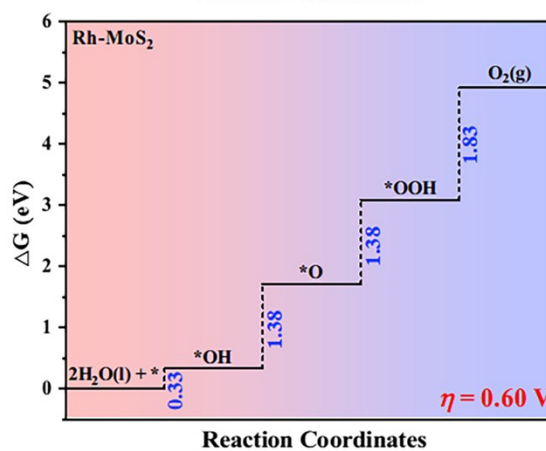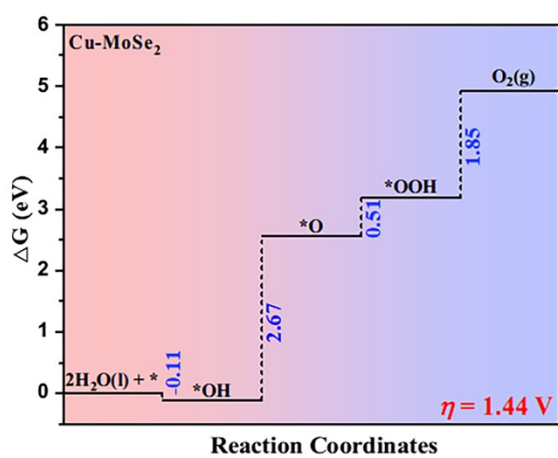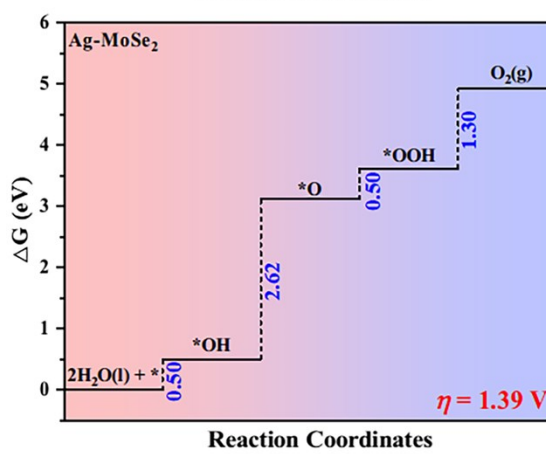

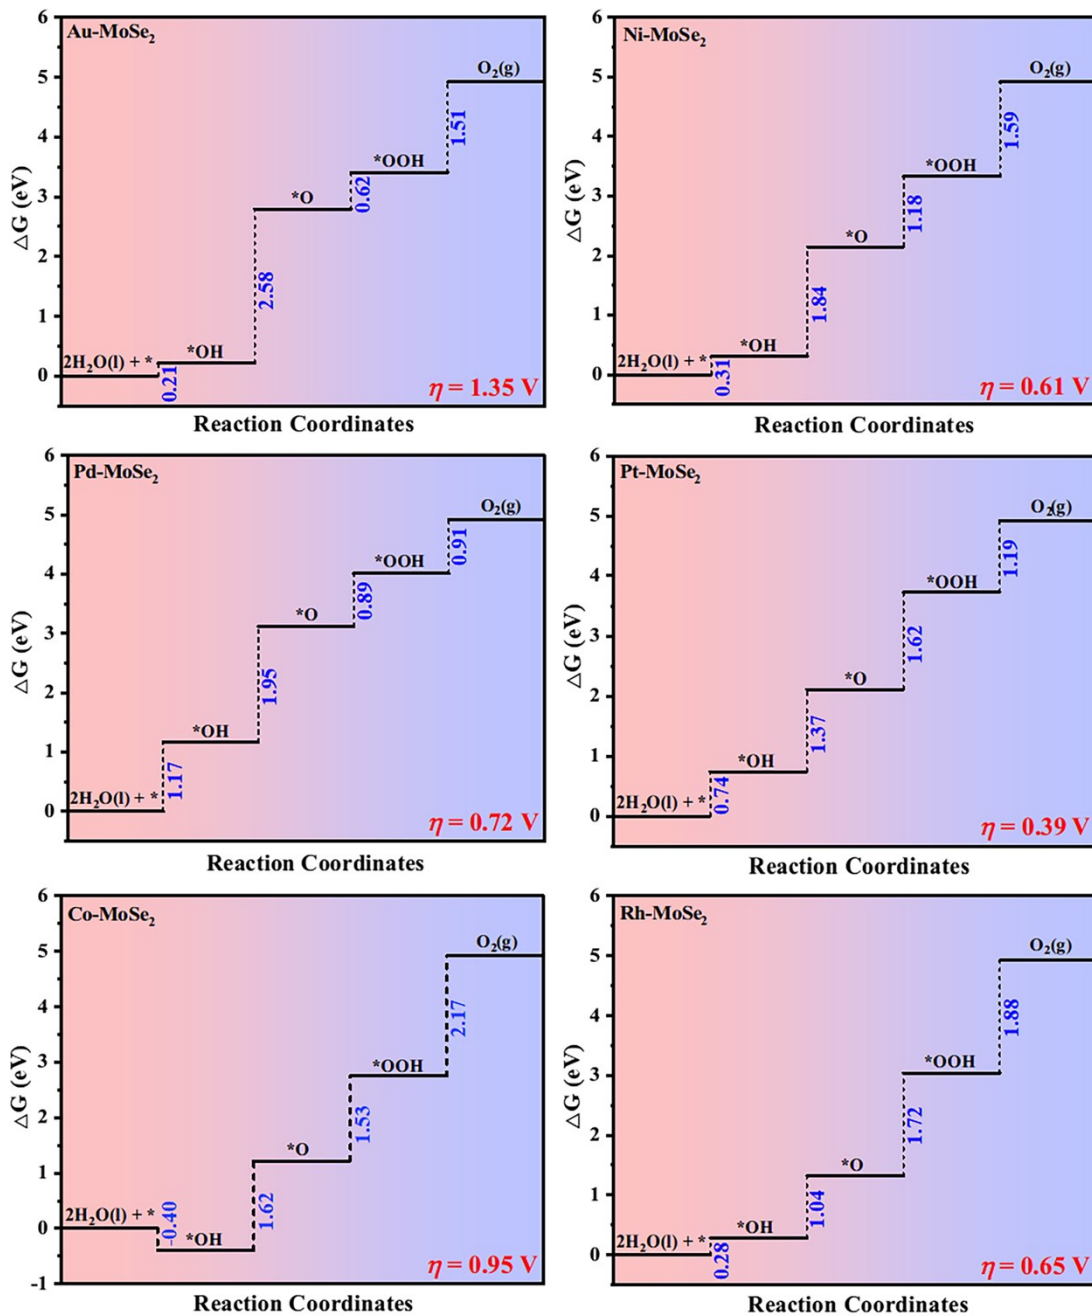

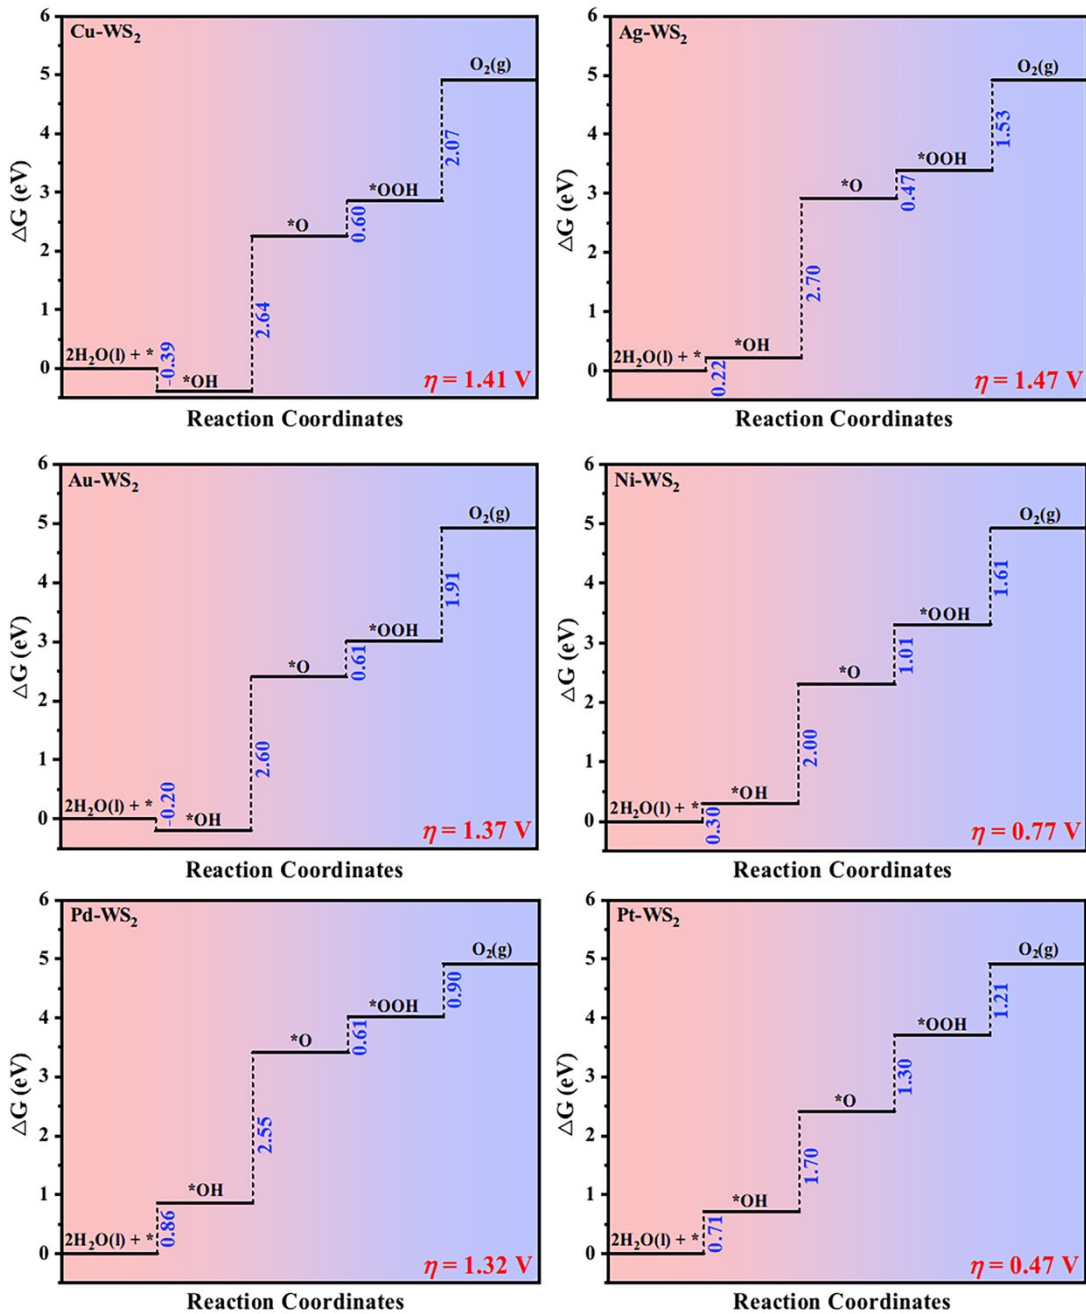



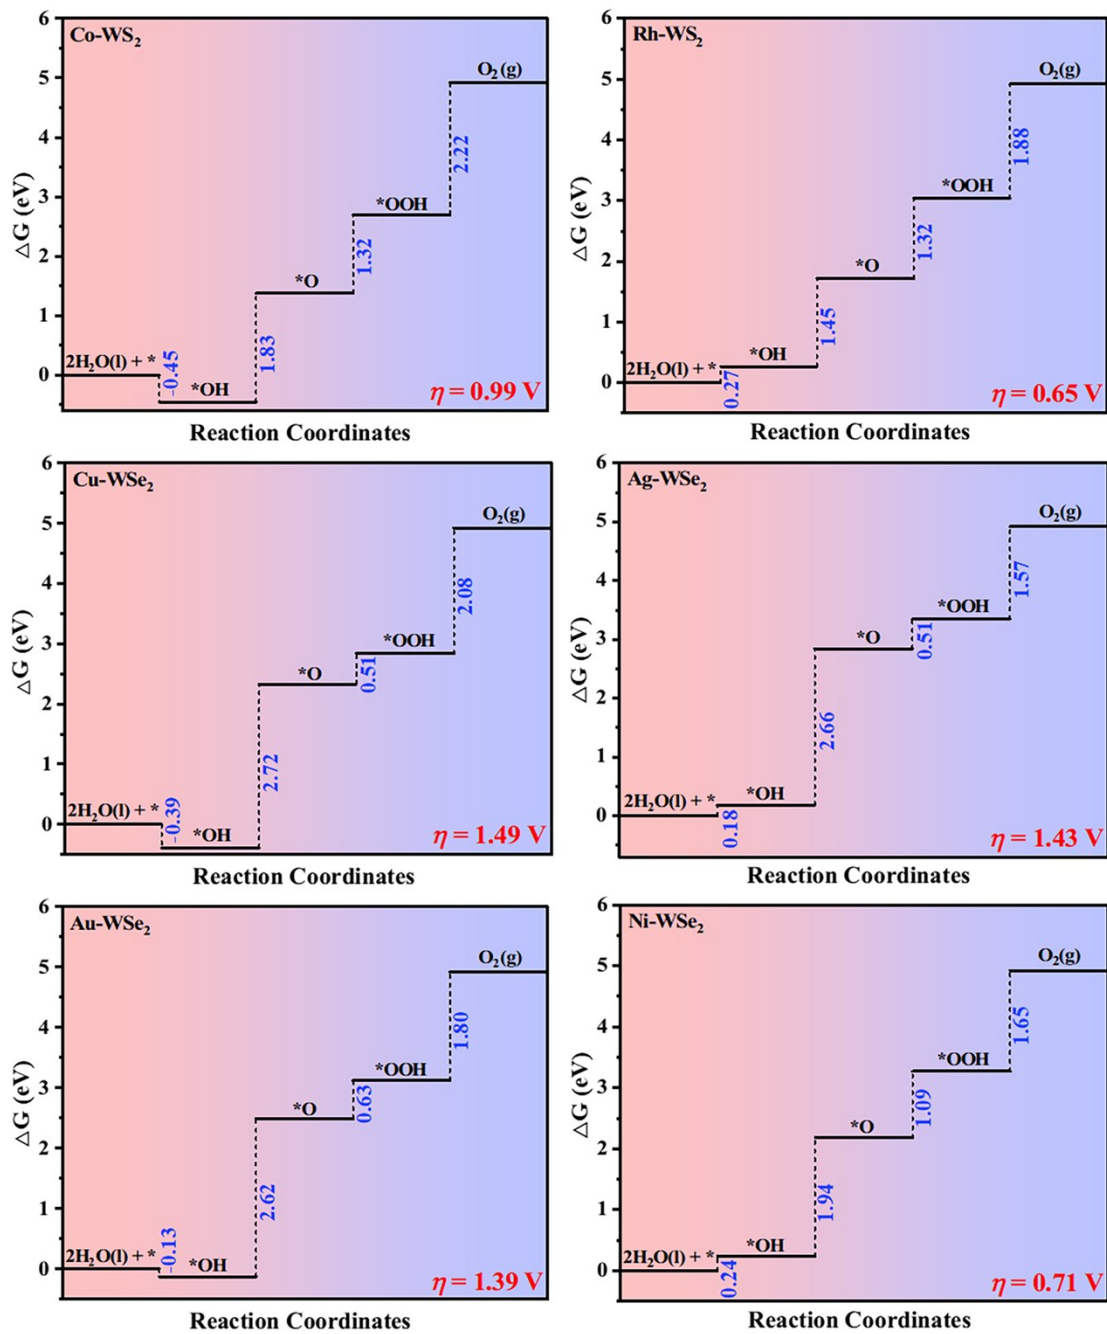

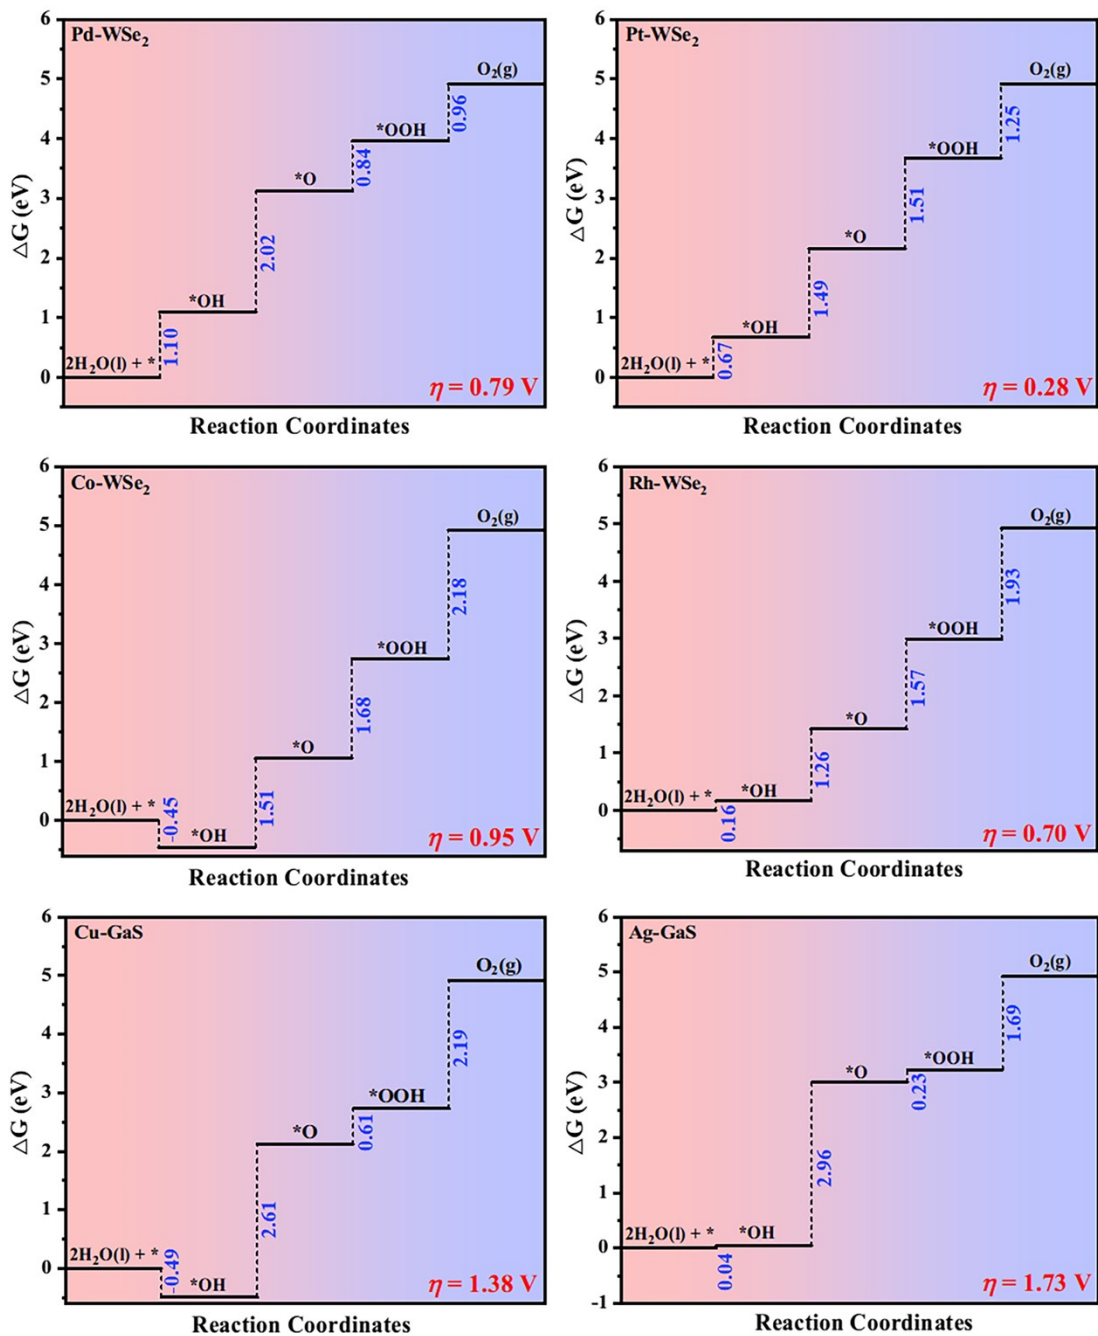

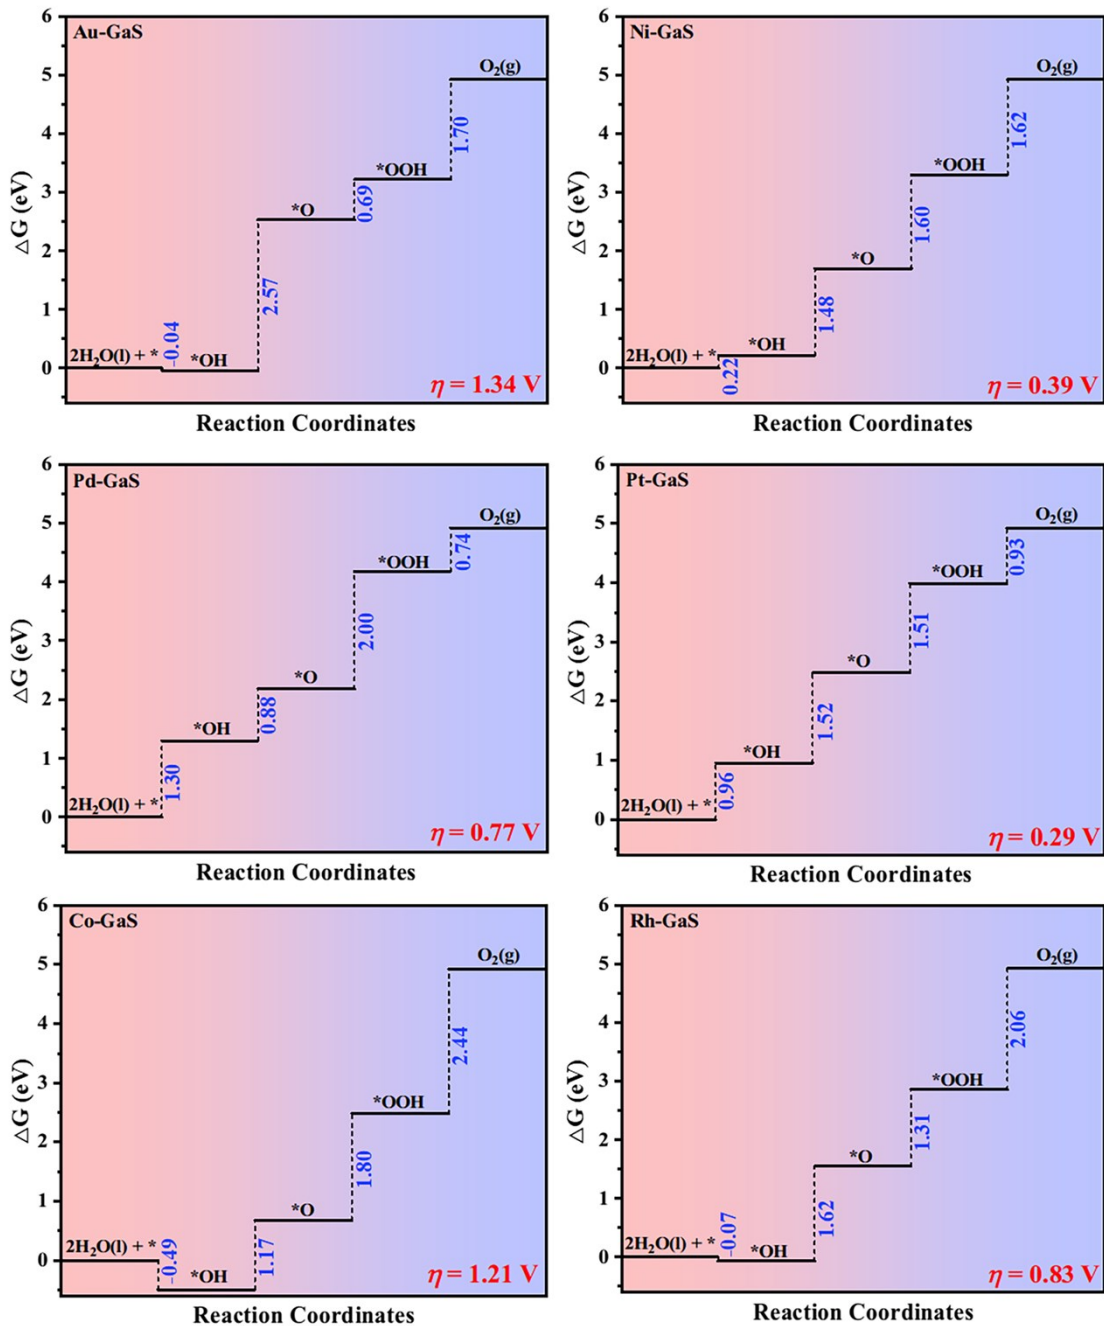

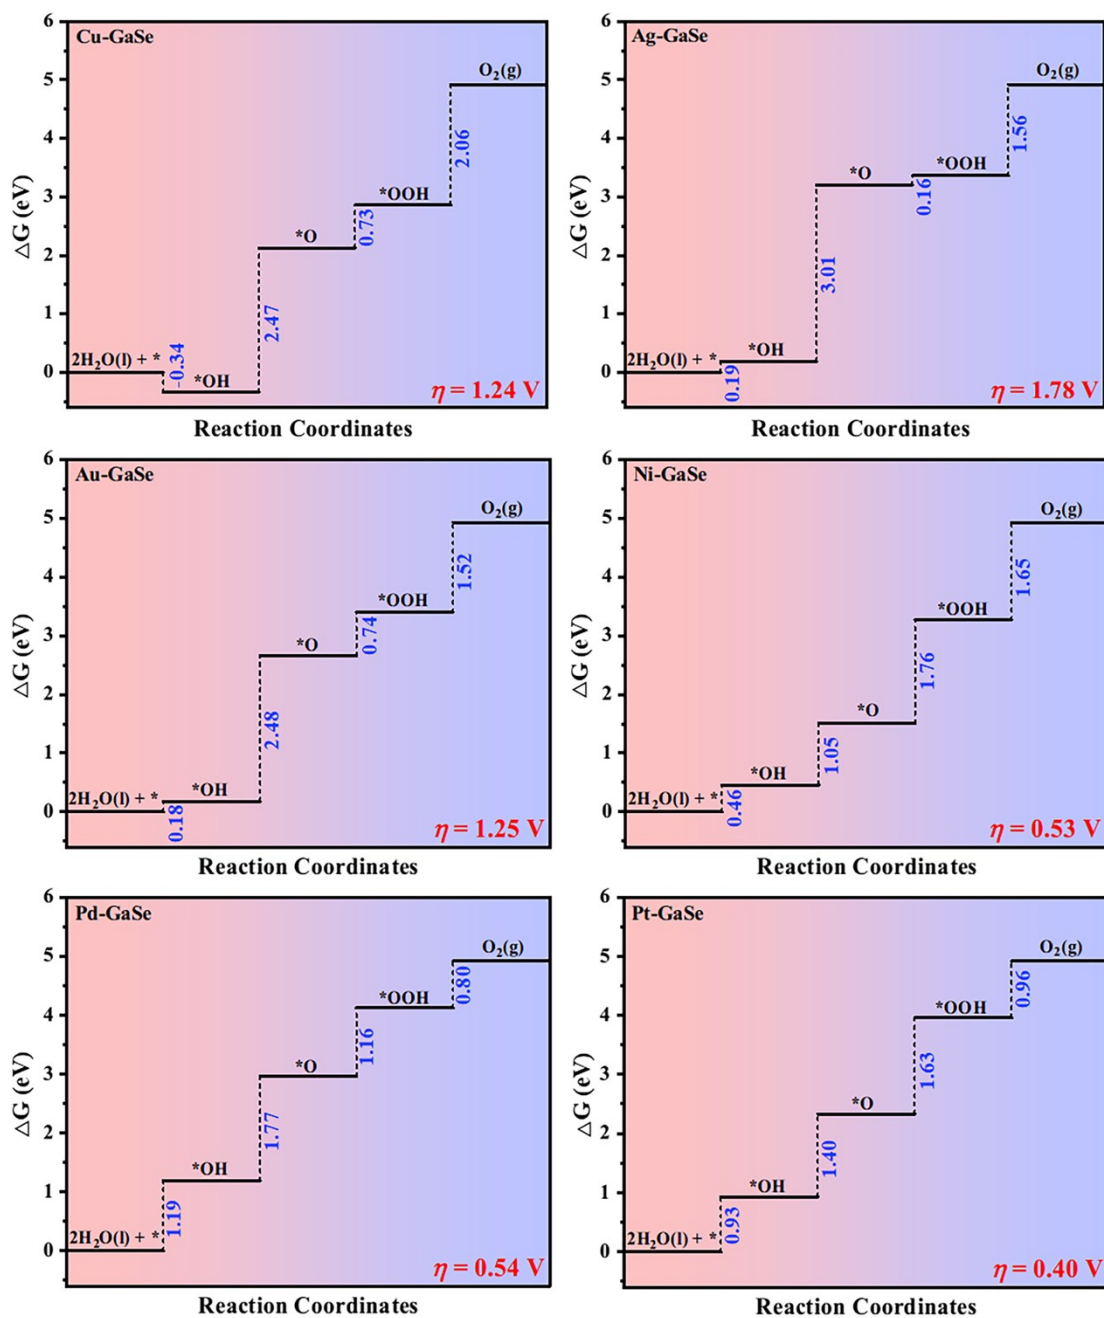

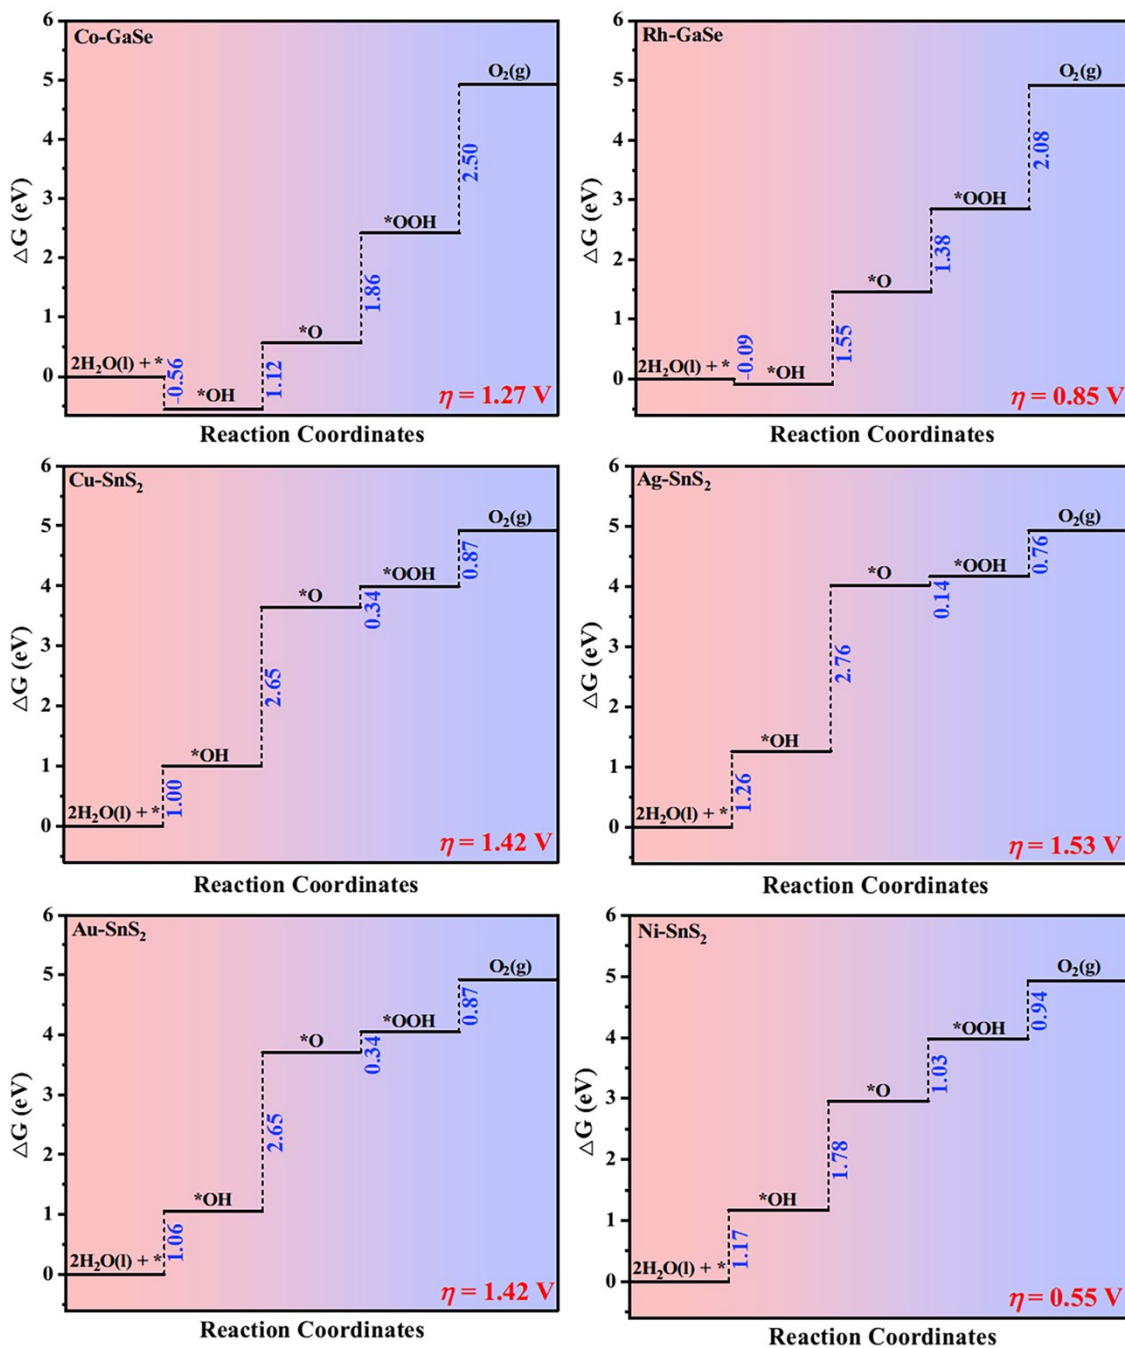

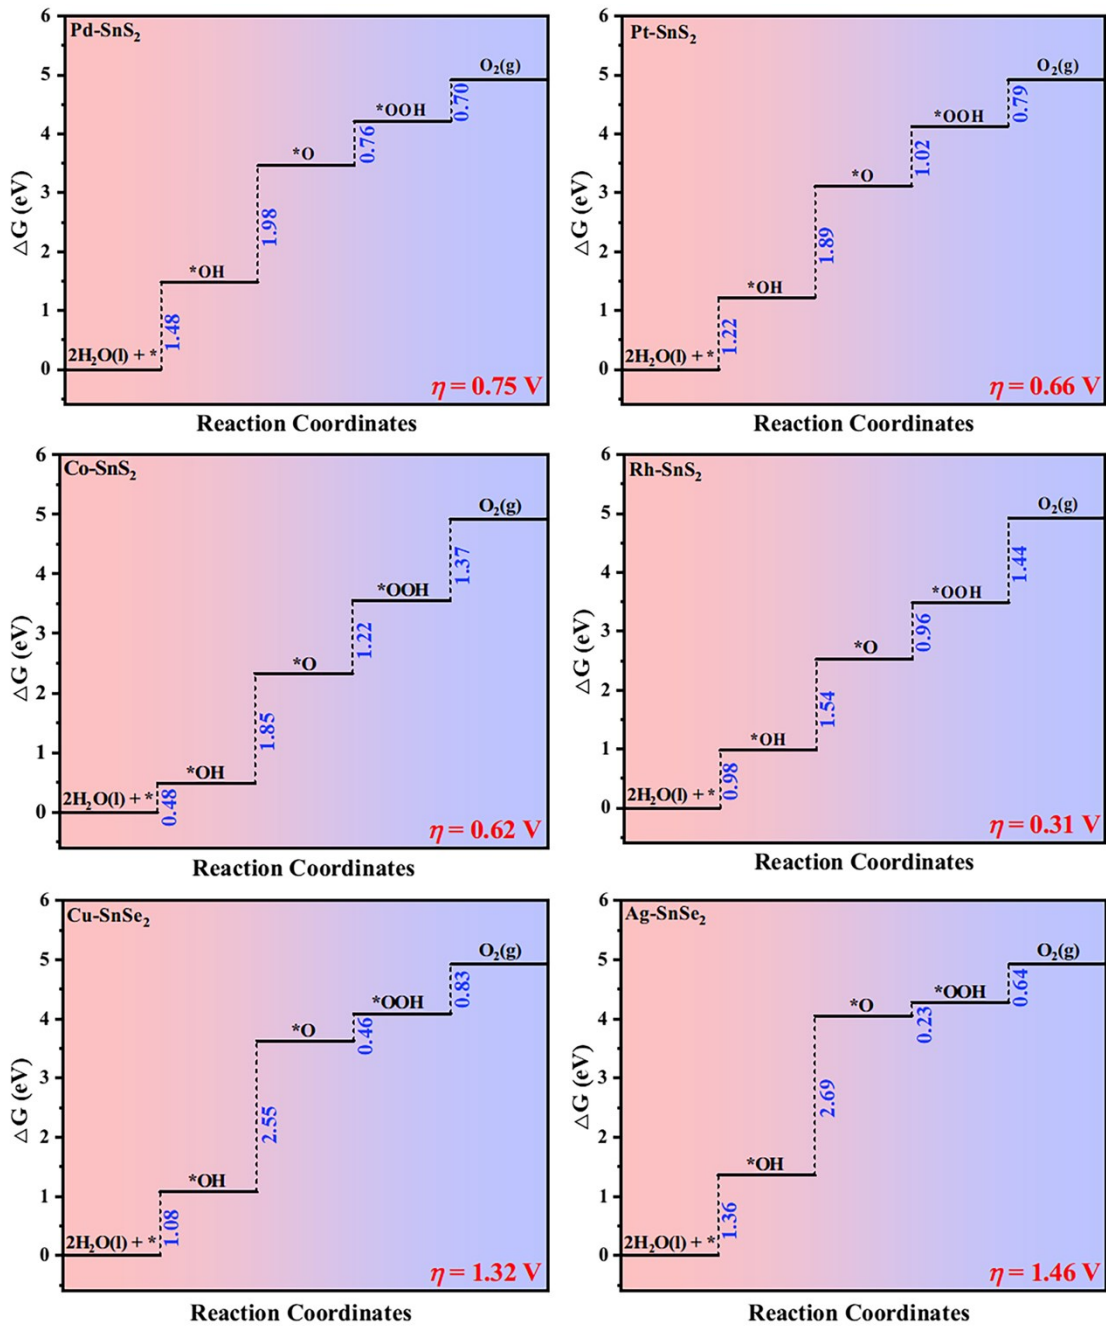

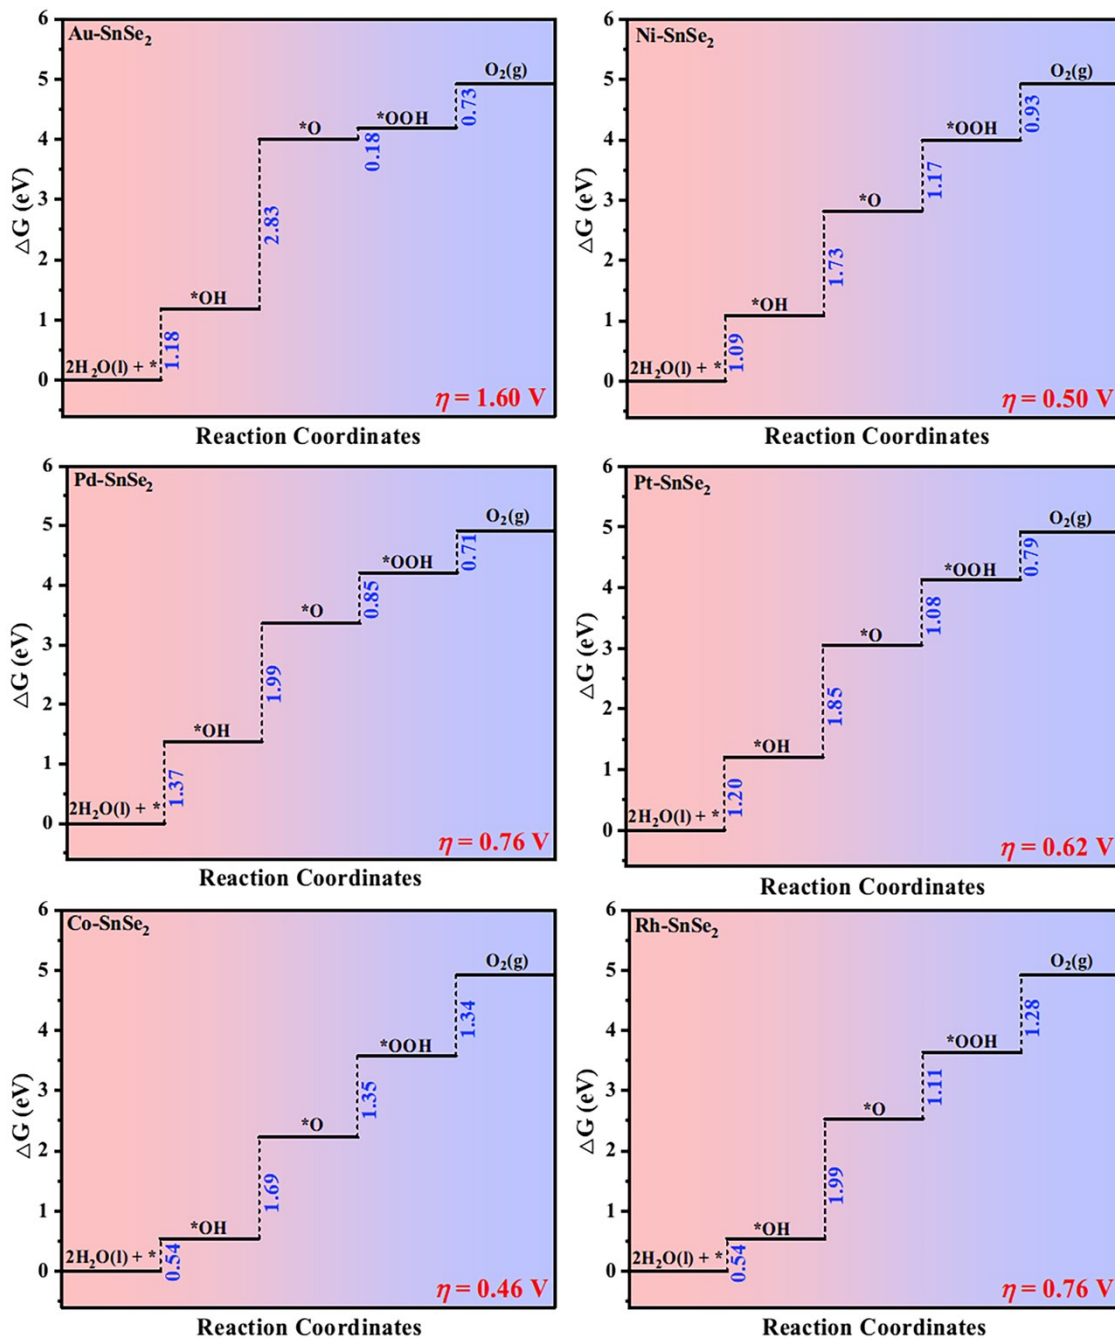

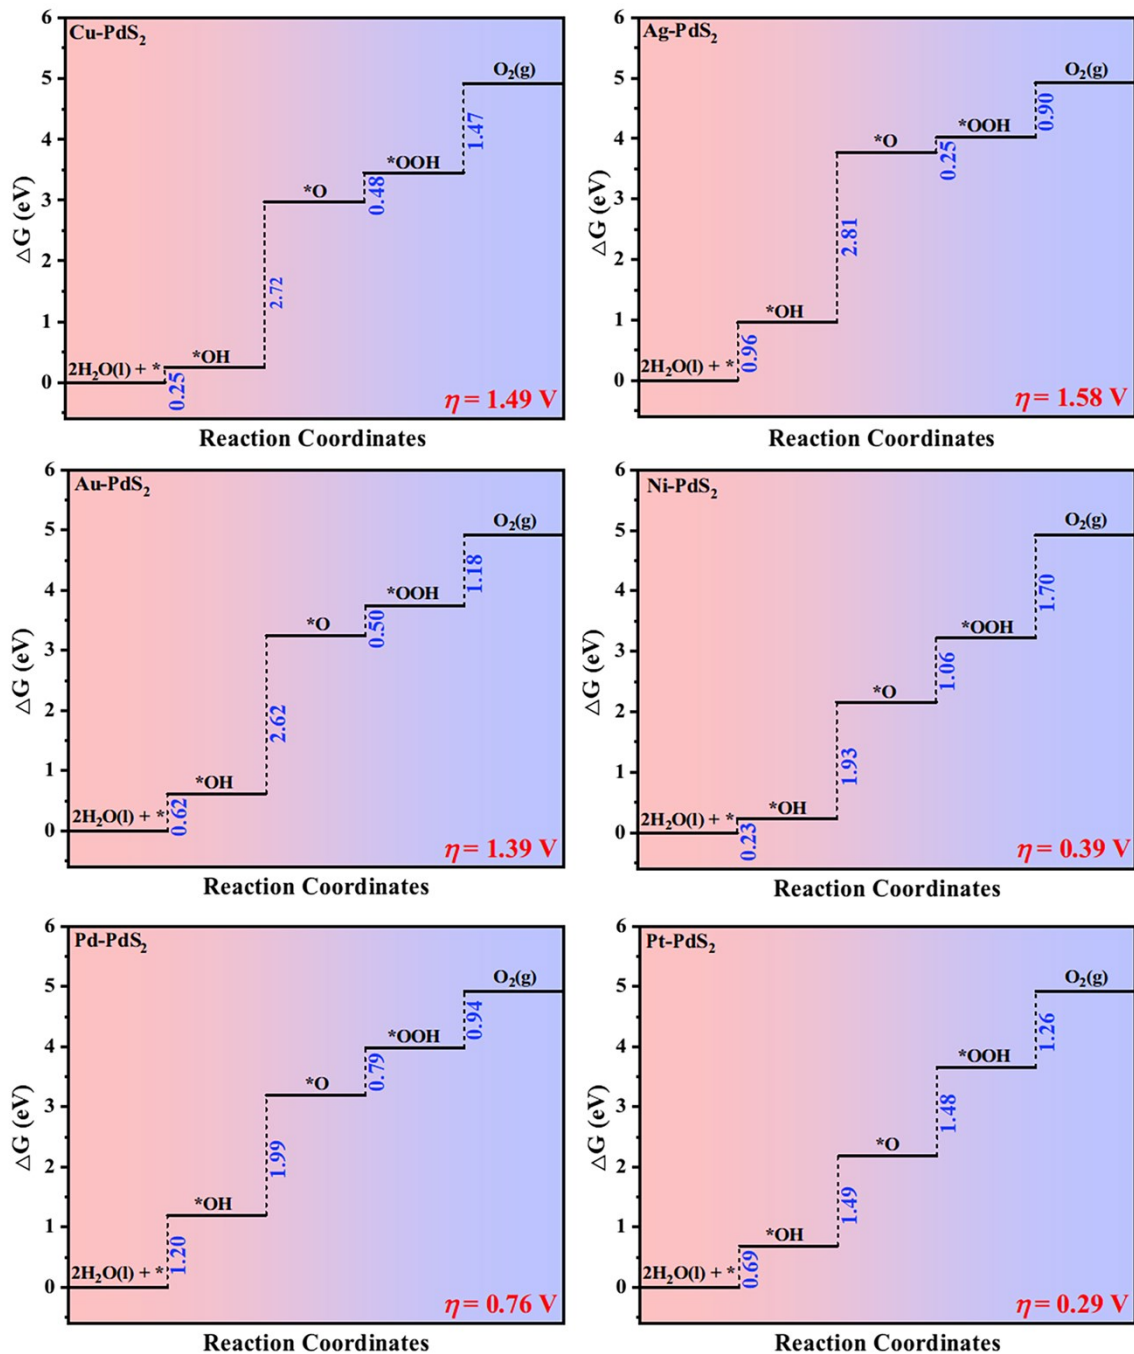



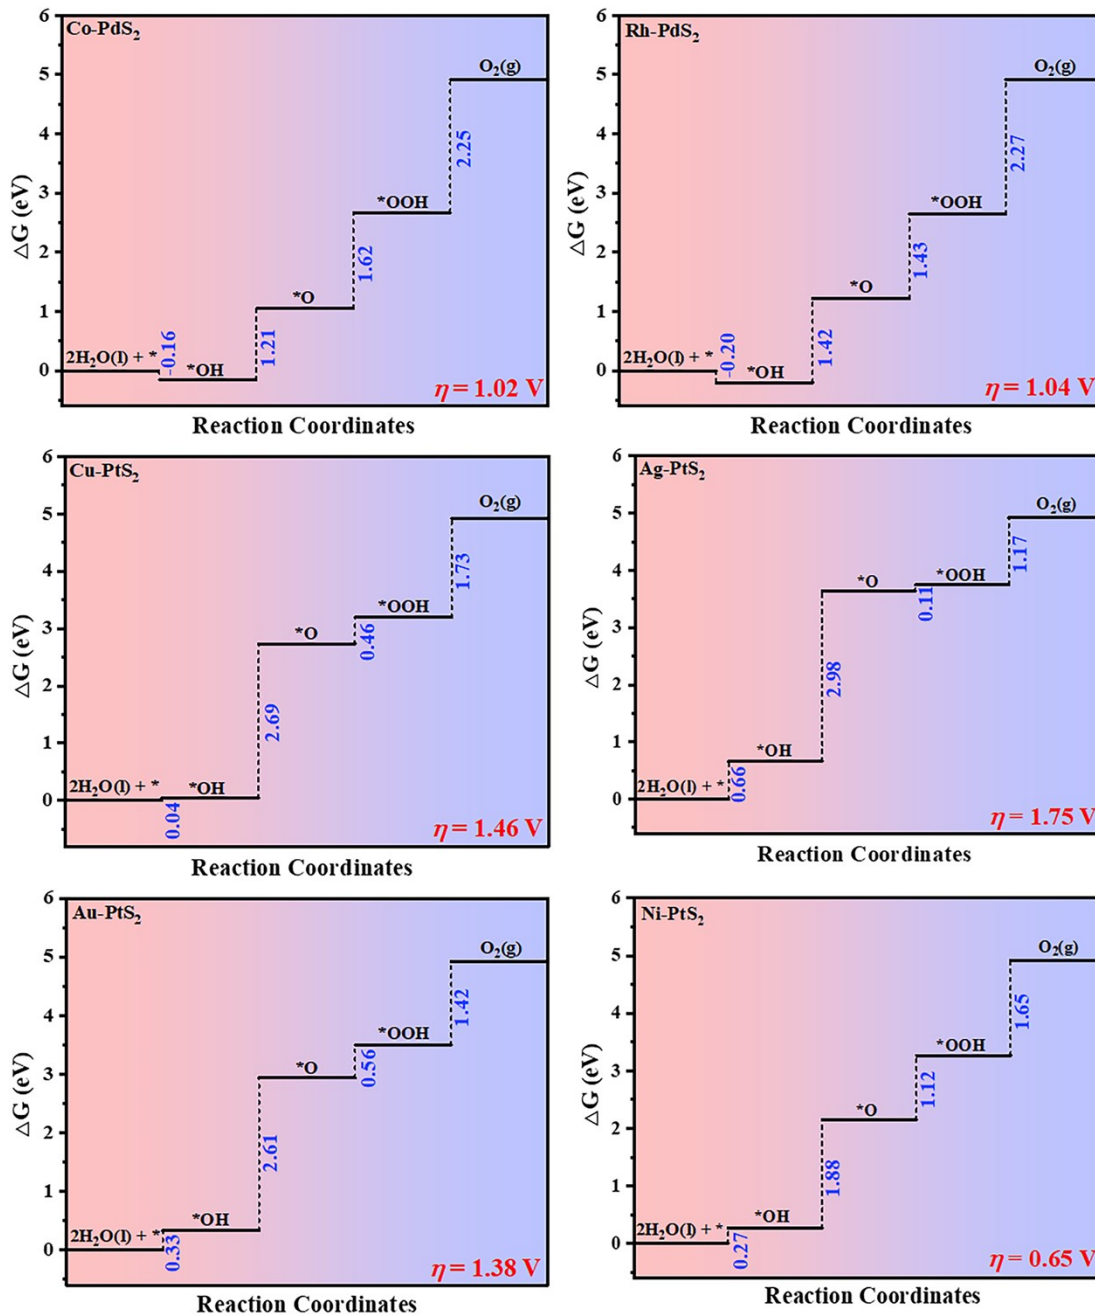

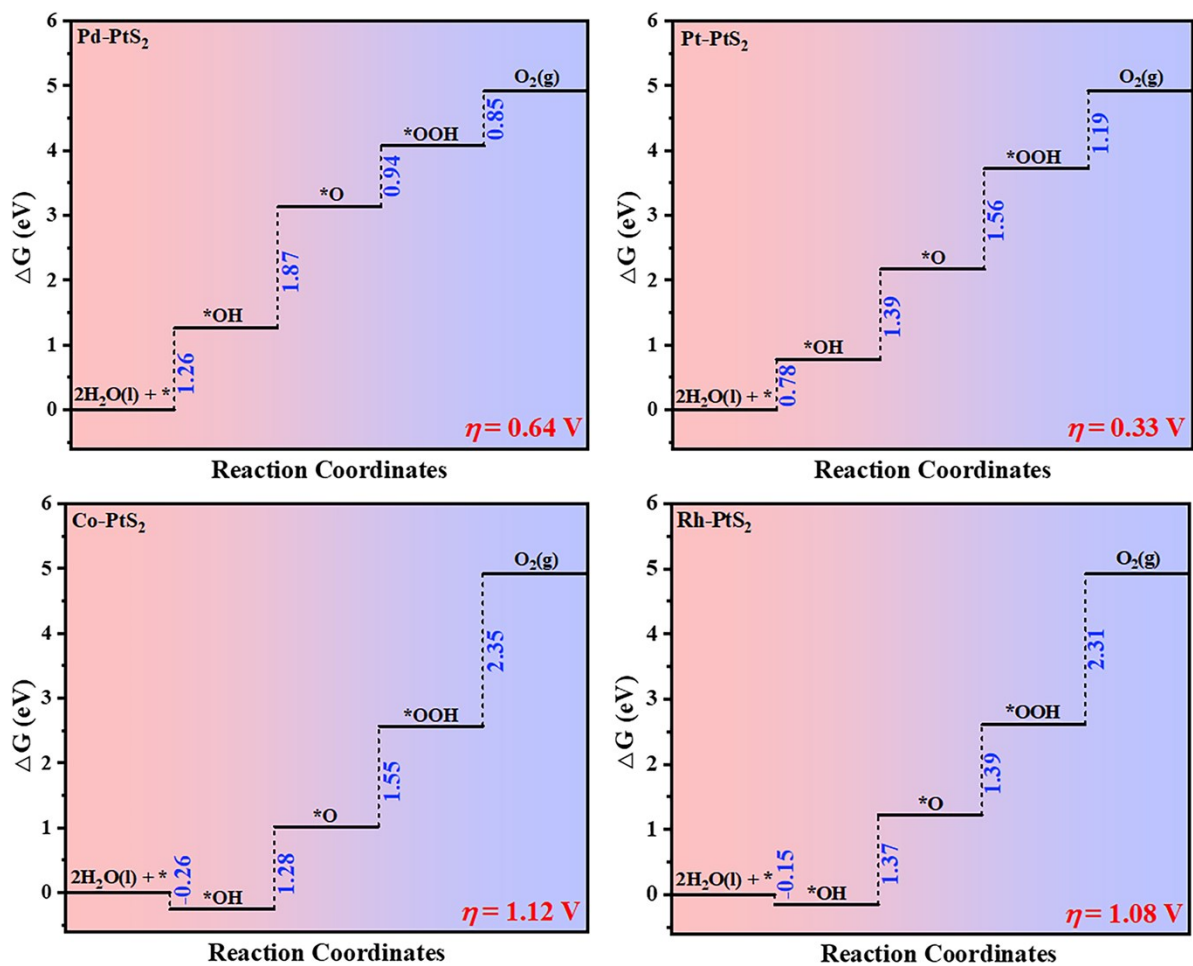

Fig. S4 Free energy diagrams for various SACs.

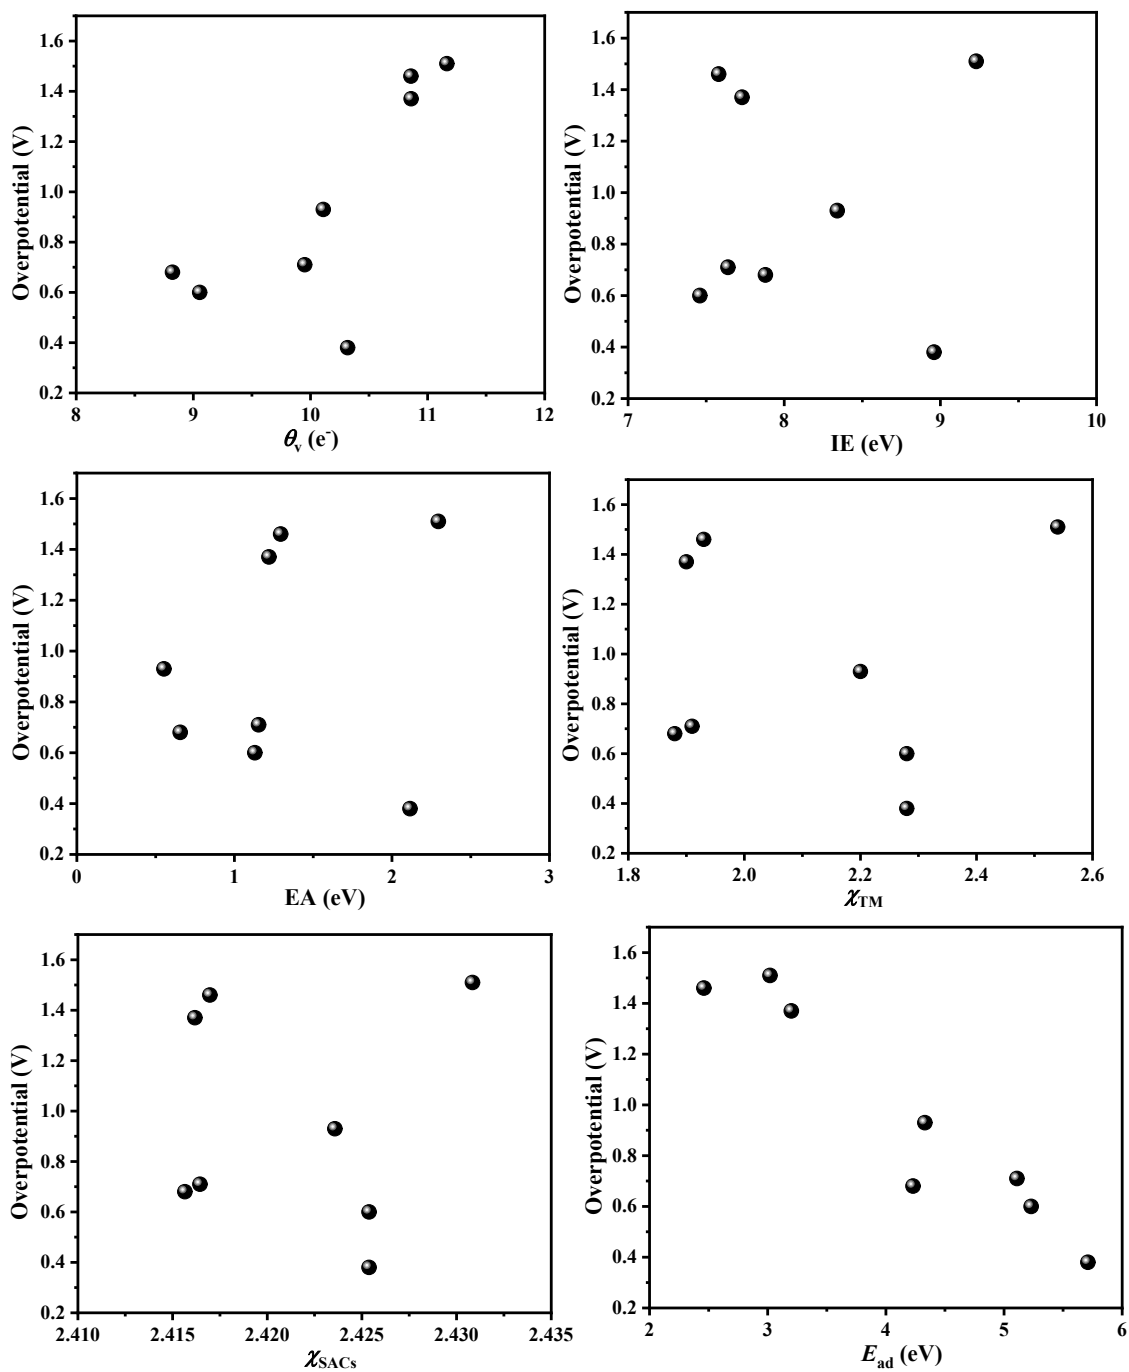

**Fig. S5** Scaling relationship between the  $\theta_v$ , IE, EA,  $\chi_{TM}$ ,  $\chi_{SACs}$ ,  $E_{ad}$  and the OER overpotentials of TM-MoS<sub>2</sub>.

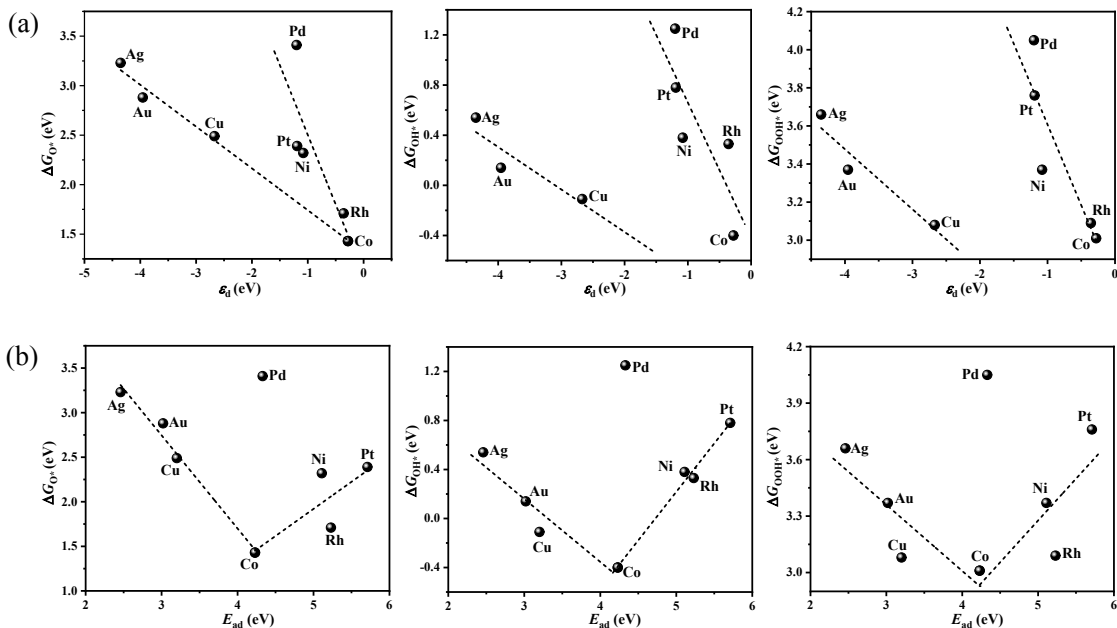

**Fig. S6** Scaling relationship between (a) the  $d$ -band center; (b) the  $E_{ad}$  of TM atoms and  $\Delta G_{O^*}/\Delta G_{OH^*}/\Delta G_{OOH^*}$  for TM-MoS<sub>2</sub>.

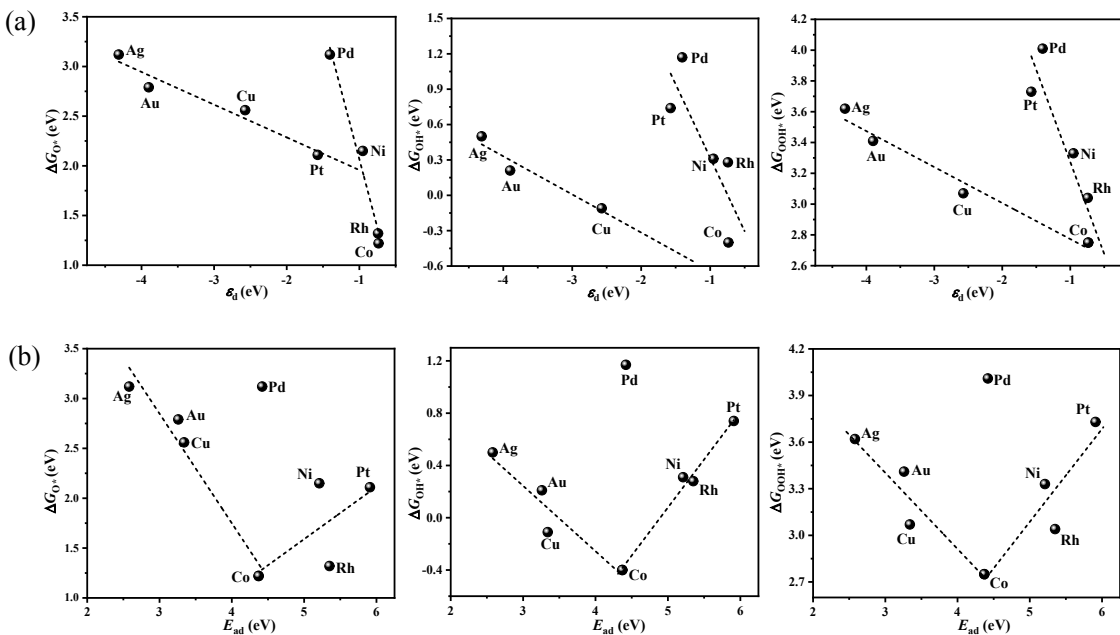

**Fig. S7** Scaling relationship between (a) the  $d$ -band center; (b) the  $E_{ad}$  of TM atoms and  $\Delta G_{O^*}/\Delta G_{OH^*}/\Delta G_{OOH^*}$  for TM-MoS<sub>2e</sub>.

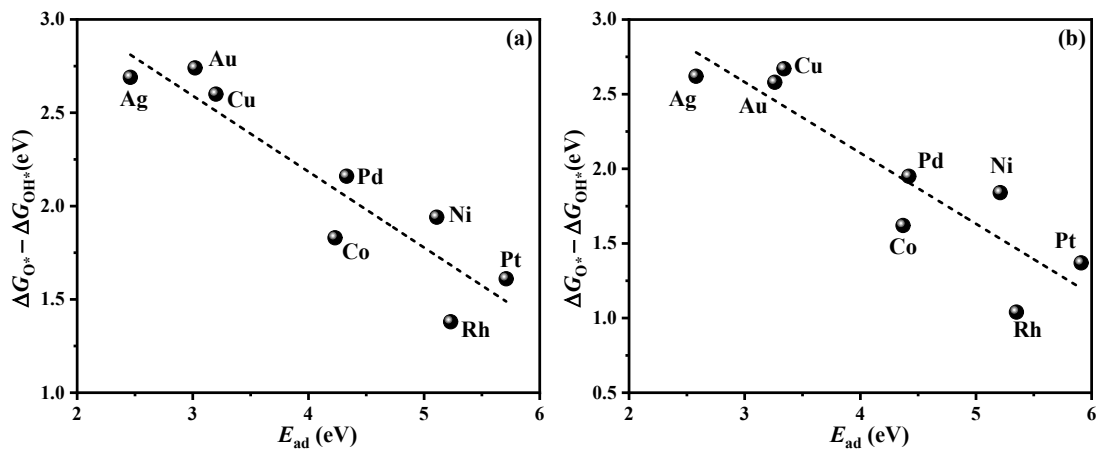

**Fig. S8** Scaling relationship between the  $E_{ad}$  and  $\Delta G_{O^*} - \Delta G_{OH^*}$  of (a) MoS<sub>2</sub> and (b) MoSe<sub>2</sub>.

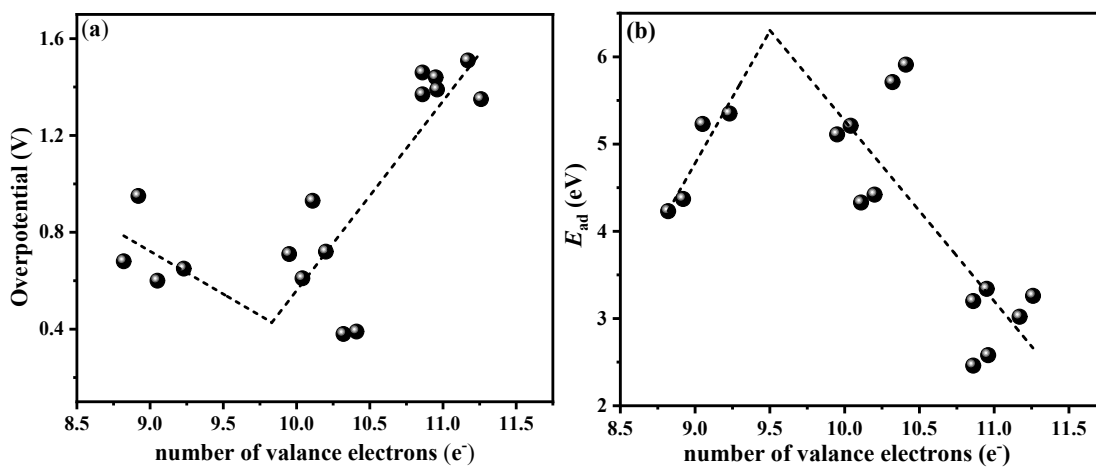

**Fig. S9** Scaling relationship between the  $\theta_v$  of active center and (a) the overpotential of the reaction; (b)  $E_{ad}$  of the TMs.

**Table S1.** Calculated Lattice Parameters (Å) and Bond Lengths (Å) of Various Monolayer Materials. (A Represents the Metal Atoms and X Represents the S/Se Atoms)

| substrates        | $a = b$              |                       | $d_{A-X}$            |                       |
|-------------------|----------------------|-----------------------|----------------------|-----------------------|
|                   | this work            | previous works        | this work            | previous works        |
| MoS <sub>2</sub>  | 3.18 <sup>[S2]</sup> | 3.16 <sup>[S3]</sup>  | 2.41 <sup>[S2]</sup> | 2.41 <sup>[S4]</sup>  |
| MoSe <sub>2</sub> | 3.29 <sup>[S2]</sup> | 3.29 <sup>[S3]</sup>  | 2.53 <sup>[S2]</sup> | 2.54 <sup>[S5]</sup>  |
| WS <sub>2</sub>   | 3.17 <sup>[S2]</sup> | 3.15 <sup>[S3]</sup>  | 2.41 <sup>[S2]</sup> | 2.40 <sup>[S6]</sup>  |
| WSe <sub>2</sub>  | 3.29 <sup>[S2]</sup> | 3.29 <sup>[S3]</sup>  | 2.54 <sup>[S2]</sup> | 2.53 <sup>[S6]</sup>  |
| GaS               | 3.62 <sup>[S2]</sup> | 3.64 <sup>[S7]</sup>  | 2.36 <sup>[S2]</sup> | 2.34 <sup>[S8]</sup>  |
| GaSe              | 3.80 <sup>[S2]</sup> | 3.82 <sup>[S7]</sup>  | 2.49 <sup>[S2]</sup> | 2.47 <sup>[S8]</sup>  |
| SnS <sub>2</sub>  | 3.67                 | 3.65 <sup>[S9]</sup>  | 2.59                 | 2.63 <sup>[S10]</sup> |
| SnSe <sub>2</sub> | 3.85                 | 3.81 <sup>[S11]</sup> | 2.74                 | 2.73 <sup>[S12]</sup> |
| PdS <sub>2</sub>  | 3.52                 | 3.53 <sup>[S13]</sup> | 2.39                 | 2.40 <sup>[S13]</sup> |
| PtS <sub>2</sub>  | 3.54                 | 3.54 <sup>[S13]</sup> | 2.39                 | 2.39 <sup>[S14]</sup> |

**Table S2.** Adsorption energies of various SACs. The Unit for Energy is eV.

|                   | Cu   | Ag   | Au   | Ni   | Pd   | Pt   | Co   | Rh   |
|-------------------|------|------|------|------|------|------|------|------|
| MoS <sub>2</sub>  | 3.20 | 2.46 | 3.02 | 5.11 | 4.33 | 5.71 | 4.2  | 5.23 |
| MoSe <sub>2</sub> | 3.24 | 2.58 | 3.26 | 5.21 | 4.42 | 5.91 | 4.37 | 5.35 |
| WS <sub>2</sub>   | 2.95 | 2.26 | 2.92 | 5.09 | 4.46 | 5.96 | 4.17 | 5.37 |
| WSe <sub>2</sub>  | 3.10 | 2.36 | 3.12 | 5.20 | 4.52 | 6.12 | 4.34 | 5.48 |
| GaS               | 2.68 | 2.02 | 3.21 | 5.03 | 4.86 | 6.68 | 3.78 | 5.50 |
| GaSe              | 2.99 | 2.36 | 3.76 | 5.19 | 5.01 | 6.88 | 4.01 | 5.80 |
| SnS <sub>2</sub>  | 3.15 | 1.56 | 2.08 | 5.33 | 3.64 | 5.24 | 4.80 | 5.45 |
| SnSe <sub>2</sub> | 3.49 | 2.08 | 2.73 | 5.49 | 3.97 | 5.67 | 5.04 | 5.92 |
| PdS <sub>2</sub>  | 3.11 | 2.56 | 2.96 | 4.67 | 3.95 | 5.09 | 3.85 | 4.56 |
| PtS <sub>2</sub>  | 3.34 | 2.63 | 3.16 | 5.27 | 4.46 | 5.81 | 4.42 | 5.16 |

**Table S3.** The Zero-point Energy ( $E_{ZPE}$ ) of Various OER Intermediates on TM-MoS<sub>2</sub>. The Unit for Energy is eV.

|                     | O*   | OH*  | OOH* |
|---------------------|------|------|------|
| ref <sup>[S1]</sup> | 0.07 | 0.36 | 0.39 |
| Cu-MoS <sub>2</sub> | 0.04 | 0.32 | 0.43 |
| Ag-MoS <sub>2</sub> | 0.03 | 0.31 | 0.41 |
| Au-MoS <sub>2</sub> | 0.05 | 0.31 | 0.42 |
| Ni-MoS <sub>2</sub> | 0.05 | 0.33 | 0.42 |
| Pd-MoS <sub>2</sub> | 0.06 | 0.32 | 0.42 |
| Pt-MoS <sub>2</sub> | 0.07 | 0.33 | 0.43 |
| Co-MoS <sub>2</sub> | 0.06 | 0.33 | 0.41 |
| Rh-MoS <sub>2</sub> | 0.07 | 0.34 | 0.44 |

**Table S4.** The Solvation Energies Corrections ( $G_{solv}$ ), Zero-point Energy ( $E_{ZPE}$ ) and Entropy ( $S$ ) of Gas or Liquid Phase Molecules and Various OER Intermediates. The Unit for Energy is eV.

| Species              | $G_{solv}$ | $E_{ZPE}$ | $TS$ |
|----------------------|------------|-----------|------|
| H <sub>2</sub> O (l) | 0.00       | 0.56      | 0.67 |
| H <sub>2</sub> (g)   | 0.00       | 0.27      | 0.41 |
| O*                   | 0.00       | 0.07      | 0.00 |
| OH*                  | -0.30      | 0.36      | 0.00 |
| OOH*                 | -0.30      | 0.39      | 0.00 |

The data are obtained from the ref<sup>[S1]</sup>

## Reference

- [S1] C. Y. Ling, L. Shi, Y. X. Ouyang, X. C. Zeng and J. L. Wang, *Nano Lett.*, 2017, **17**, 5133-5139.
- [S2] H. C. Huang, Y. Zhao, J. Wang, J. Li, J. Chen, Q. Fu, Y. X. Bu and S. B. Cheng, *J. Mater. Chem. A*, 2020, **8**, 9202-9208.
- [S3] J. A. Wilson, A. D. Yoffe, *Adv. Phys.*, 1969, **18**, 193-335.
- [S4] H. Xu, J. J. Yi, X. J. She, Q. Liu, L. Song, S. M. Chen, Y. C. Yang, Y. H. Song, R. Vajtai, J. Lou, H. M. Li, S. Q. Yuan, J. J. Wu and P. M. Ajayan, *Appl. Catal. B-Environ.*, 2018, **220**, 379-385.
- [S5] R. Coehoorn, C. Haas, J. Dijkstra, C. J. F. Flipse, R. A. Degroot and A. Wold, *Phys. Rev. B*, 1987, **35**, 6195.
- [S6] W. J. Schutte, J. L. De Boer and F. Jellinek, *J. Solid State Chem.*, 1987, **70**, 207-209.
- [S7] Y. D. Ma, Y. Dai, M. Guo, L. Yu and B. B. Huang, *Phys. Chem. Chem. Phys.*, 2013, **15**, 7098-7105.
- [S8] Y. T. Peng, C. X. Xia, H. Zhang, T. X. Wang, S. Y. Wei and Y. Jia, *Phys. Chem. Chem. Phys.*, 2014, **16**, 18799-18804.
- [S9] L. A. Burton, T. J. Whittles, D. Hesp, W. M. Linhart, J. M. Skelton, B. Hou, R. F. Webster, G. O'Dowd, C. Reece, D. Cherns, D. J. Fermin, T. D. Veal, V. R. Dhanak and A. Walsh, *J. Mater. Chem. A*, 2016, **4**, 1312-1318.
- [S10] K. C. Ri, C. J. Yu, J. M. Kim and S. H. Choe, *Inorg. Chem.*, 2019, **58**, 1433-1441.
- [S11] B. Palosz and E. K. Salje, *J. Appl. Crystallogr.*, 1989, **22**, 622-623.



[S12] Y. C. Huang, C. Y. Ling, H. Liu, S. F. Wang and B. Y. Geng, *J. Phys. Chem. C*, 2014, **118**, 9251-9260.

[S13] Y. Wang, Y. F. Li and Z. F. Chen, *J. Mater. Chem. C*, 2015, **3**, 9603-9608.

[S14] S. H. Mir, S. Chakraborty, J. Warna, S. Narayan, P. C. Jha, P. K. Jha and R. Ahuja, *Catal. Sci. Technol.*, 2017, **7**, 687-692.
